# Supplementary material for: In Situ Metabolic Characterisation of Breast Cancer and Its Potential Impact on Therapy
Source: PubMed Central journal article supplement (PMC7563878; doi:10.3390/cancers12092492), 2020-09-03
Supplement: cancers-12-02492-s001.pdf [file cancers-12-02492-s001.pdf]

Article

# In Situ Metabolic Characterisation of Breast Cancer and Its Potential Impact on Therapy

Gábor Petővári <sup>1</sup>, Titanilla Dankó <sup>1</sup>, Anna-Mária Tókécs <sup>2</sup>, Enikő Vetlényi <sup>1</sup>, Ildikó Krencz <sup>1</sup>, Regina Raffay <sup>1</sup>, Melinda Hajdu <sup>1</sup>, Dániel Sztankovics <sup>1</sup>, Krisztina Németh <sup>3</sup>, Krisztina Vellai-Takács <sup>4</sup>, András Jeney <sup>1</sup>, Janina Kulka <sup>2</sup> and Anna Sebestyén <sup>1,\*</sup>

<sup>1</sup> 1st Department of Pathology and Experimental Cancer Research, Semmelweis University, Üllői út 26, H-1085 Budapest, Hungary; gaborpetovari@gmail.com (G.P.); tita.danko@gmail.com (T.D.); eniko.vetlenyi@gmail.com (E.V.); krencz.ildiko@gmail.com (I.K.); regiraffay@gmail.com (R.R.); melindahajdu@gmail.com (M.H.); sztankovics.daniel@gmail.com (D.S.); ajeney7@gmail.com (A.J.)

<sup>2</sup> 2nd Department of Pathology, Semmelweis University, Üllői út 93, H-1091 Budapest, Hungary; tokesa1972@yahoo.co.uk (A.M.T.); janinakulka@gmail.com (J.K.)

<sup>3</sup> MS Metabolomics Laboratory, Core Facility, Research Centre for Natural Sciences, Magyar Tudósok Blvd 2, H-1117 Budapest, Hungary; nemeth.krisztina.94@ttk.hu

<sup>4</sup> Department of Biological Anthropology, Eötvös Loránd University, Pázmány Péter sétány 1/A, H-1117 Budapest, Hungary; takacsve@gmail.com

\* Correspondence: hsebanna@gmail.com or sebestyen.anna@med.semmelweis-univ.hu

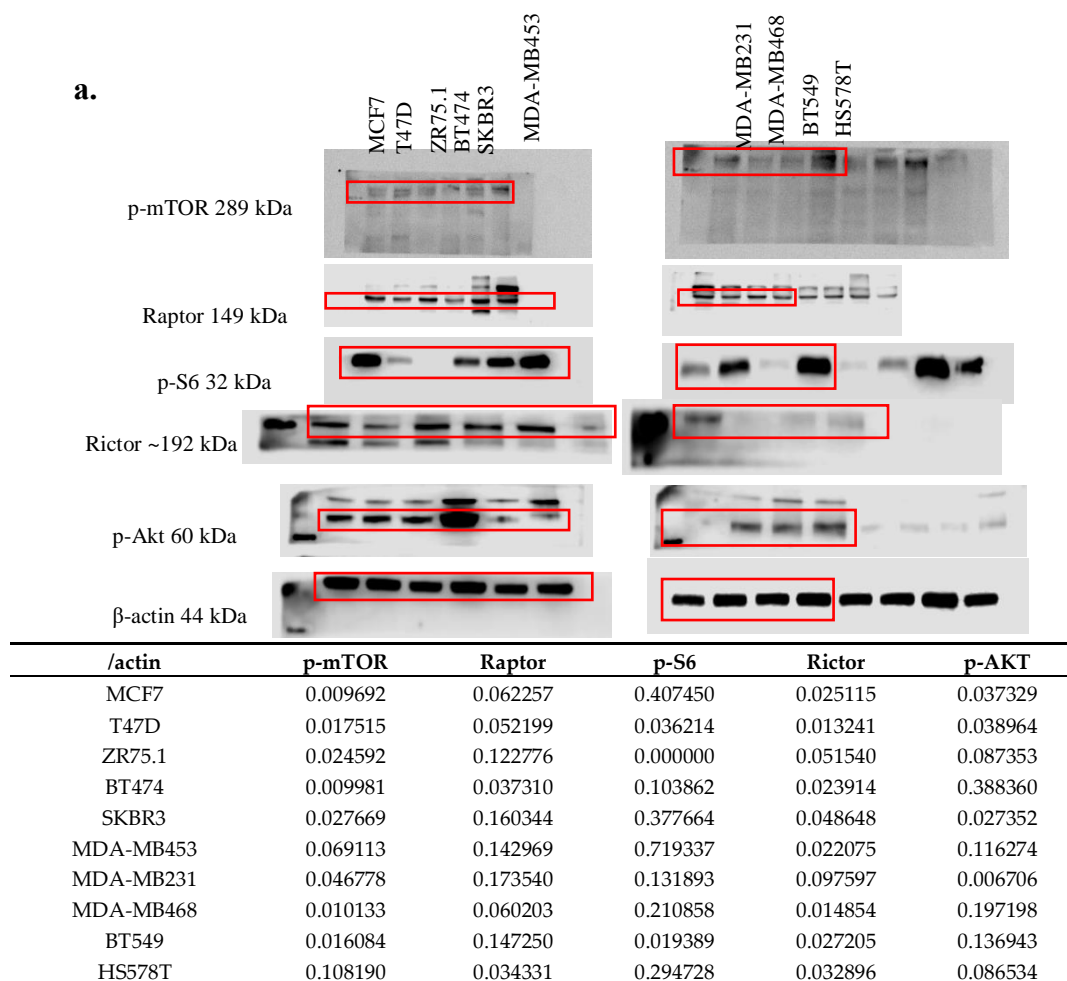

**b.**

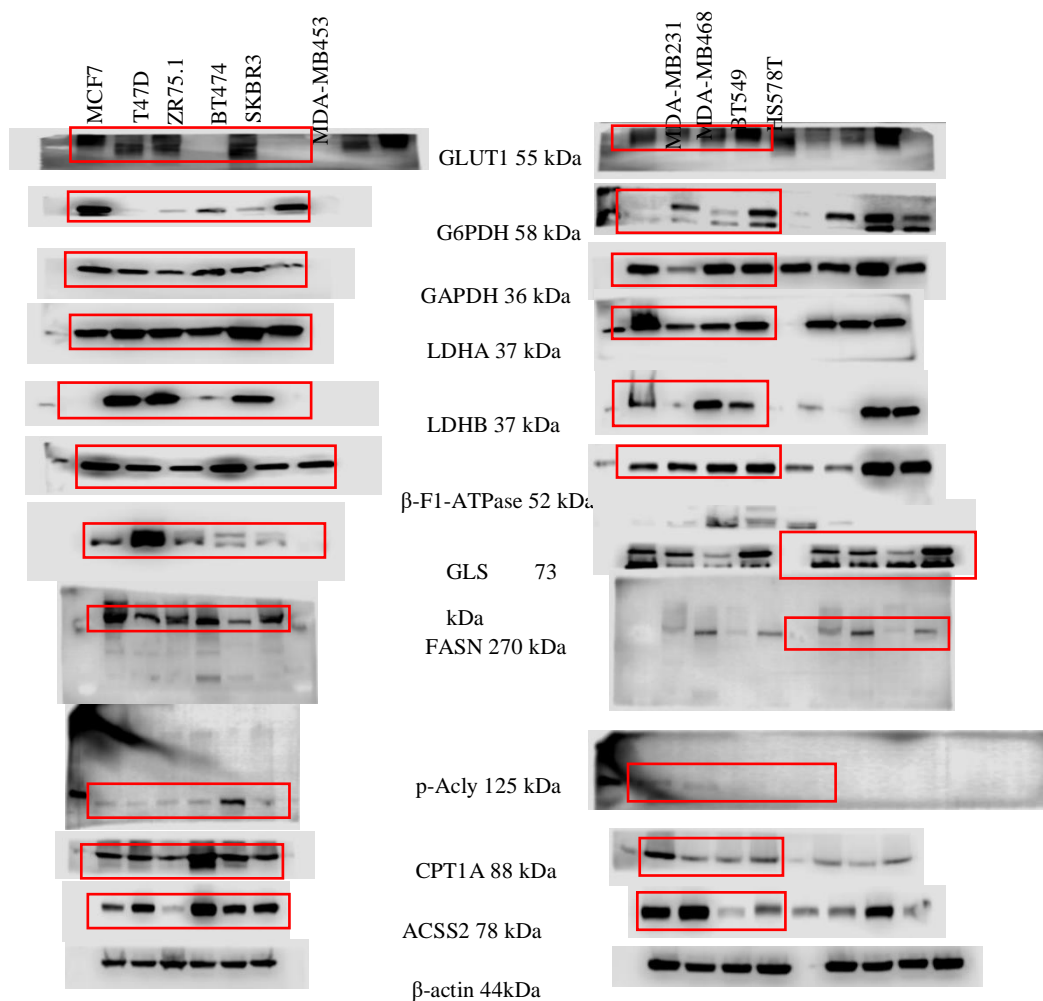

| /actin    | GLUT1     | G6PDH      | GAPDH      | LDHA     | LDHB     | ATP       | GLS      | FASN     | p-ACLY   | CPT1A    | ACSS2    |
|-----------|-----------|------------|------------|----------|----------|-----------|----------|----------|----------|----------|----------|
| MCF7      | 11.511747 | 106.140716 | 140.310162 | 0.793090 | 0.002957 | 49.216348 | 0.746460 | 0.203983 | 0.004454 | 0.307196 | 0.294221 |
| T47D      | 11.938963 | 0.619569   | 48.888147  | 1.320740 | 0.794520 | 14.507517 | 5.237127 | 0.099447 | 0.001154 | 0.369802 | 0.594837 |
| ZR75.1    | 38.514925 | 13.545570  | 186.398882 | 1.869248 | 2.445778 | 57.701895 | 2.050475 | 0.075567 | 0.004655 | 0.349128 | 0.847643 |
| BT474     | 2.932523  | 6.387747   | 61.866689  | 0.688476 | 0.199286 | 26.564703 | 0.517561 | 0.155221 | 0.004332 | 1.431211 | 3.785518 |
| SKBR3     | 25.464464 | 2.802892   | 69.854358  | 2.307582 | 0.657263 | 8.520077  | 0.568121 | 0.031417 | 0.038798 | 1.152385 | 1.217293 |
| MDA-MB453 | 7.238172  | 43.606690  | 29.550904  | 3.682152 | 0.012282 | 17.009130 | 0.061254 | 0.091424 | 0.022560 | 0.996362 | 2.415426 |
| MDA-MB231 | 7.865481  | 0.021166   | 45.105775  | 2.526111 | 0.422794 | 2.687031  | 0.169416 | 0.016869 | 0.021432 | 1.727939 | 0.753686 |
| MDA-MB468 | 17.880899 | 1.769838   | 35.981681  | 0.512552 | 0.052496 | 12.004453 | 0.272052 | 0.027829 | 0.008928 | 0.631166 | 0.723987 |
| BT549     | 16.863861 | 0.191560   | 89.382108  | 0.572487 | 0.638611 | 7.613891  | 0.239257 | 0.002270 | 0.004321 | 0.460135 | 0.133667 |
| HS578T    | 13.205971 | 0.965025   | 50.738034  | 0.758564 | 0.350125 | 5.736711  | 0.327101 | 0.010107 | 0.000726 | 0.408871 | 0.147433 |

**c.**

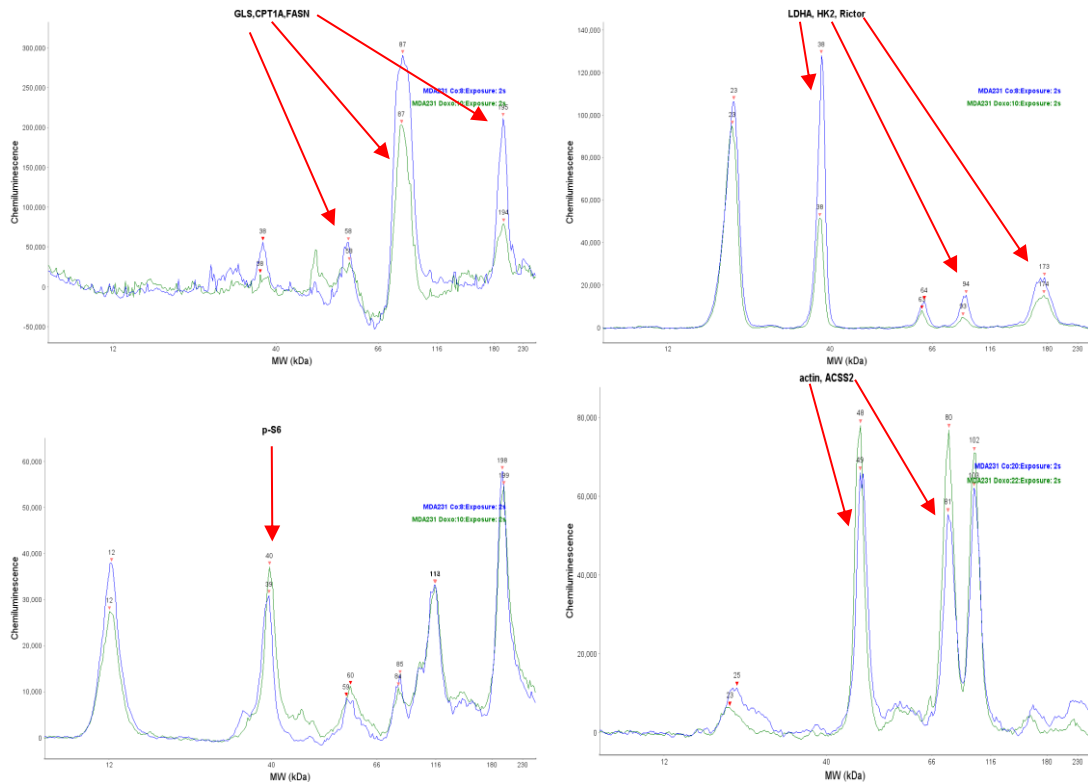

**Figure S1.** Additional information on Western blots and WES Simple. (a) The uncropped Western blot bands and densitometric values of the blots related to Figure 2. (b) The uncropped Western blot bands and densitometric value of the blots related to Figure 3. (c) The WES Simple electropherograms of the studied proteins related to Figure 4.

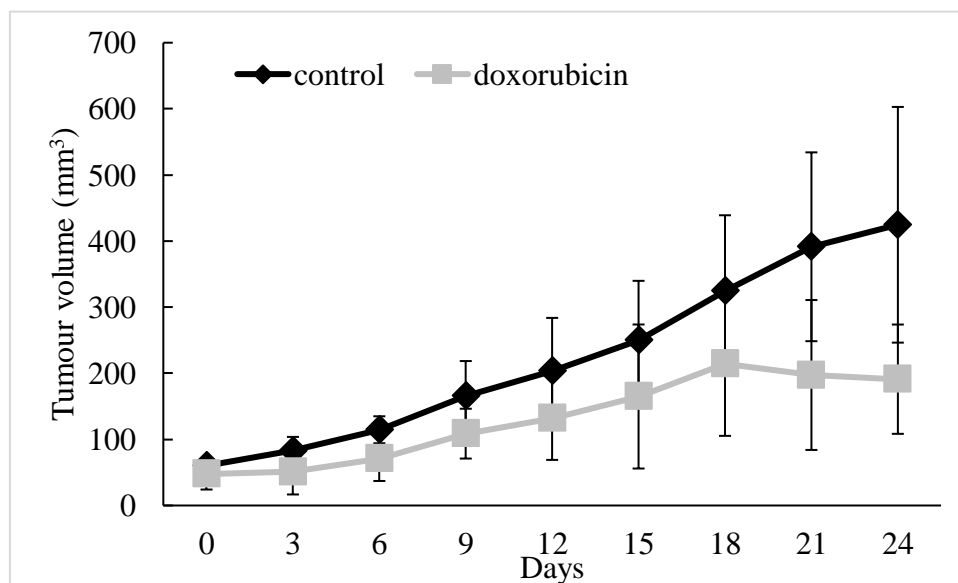

**Figure S2:** The growth curves of the in vivo MDA-MB231 xenografts after doxorubicin treatment. Doxorubicin treatment (2 mg/kg) reduced the growth and tumour volume (calculated by  $0.52 \times \text{shorter diameter}^2 \times \text{longer diameter}$ ) of MDA-MB231 in vivo.

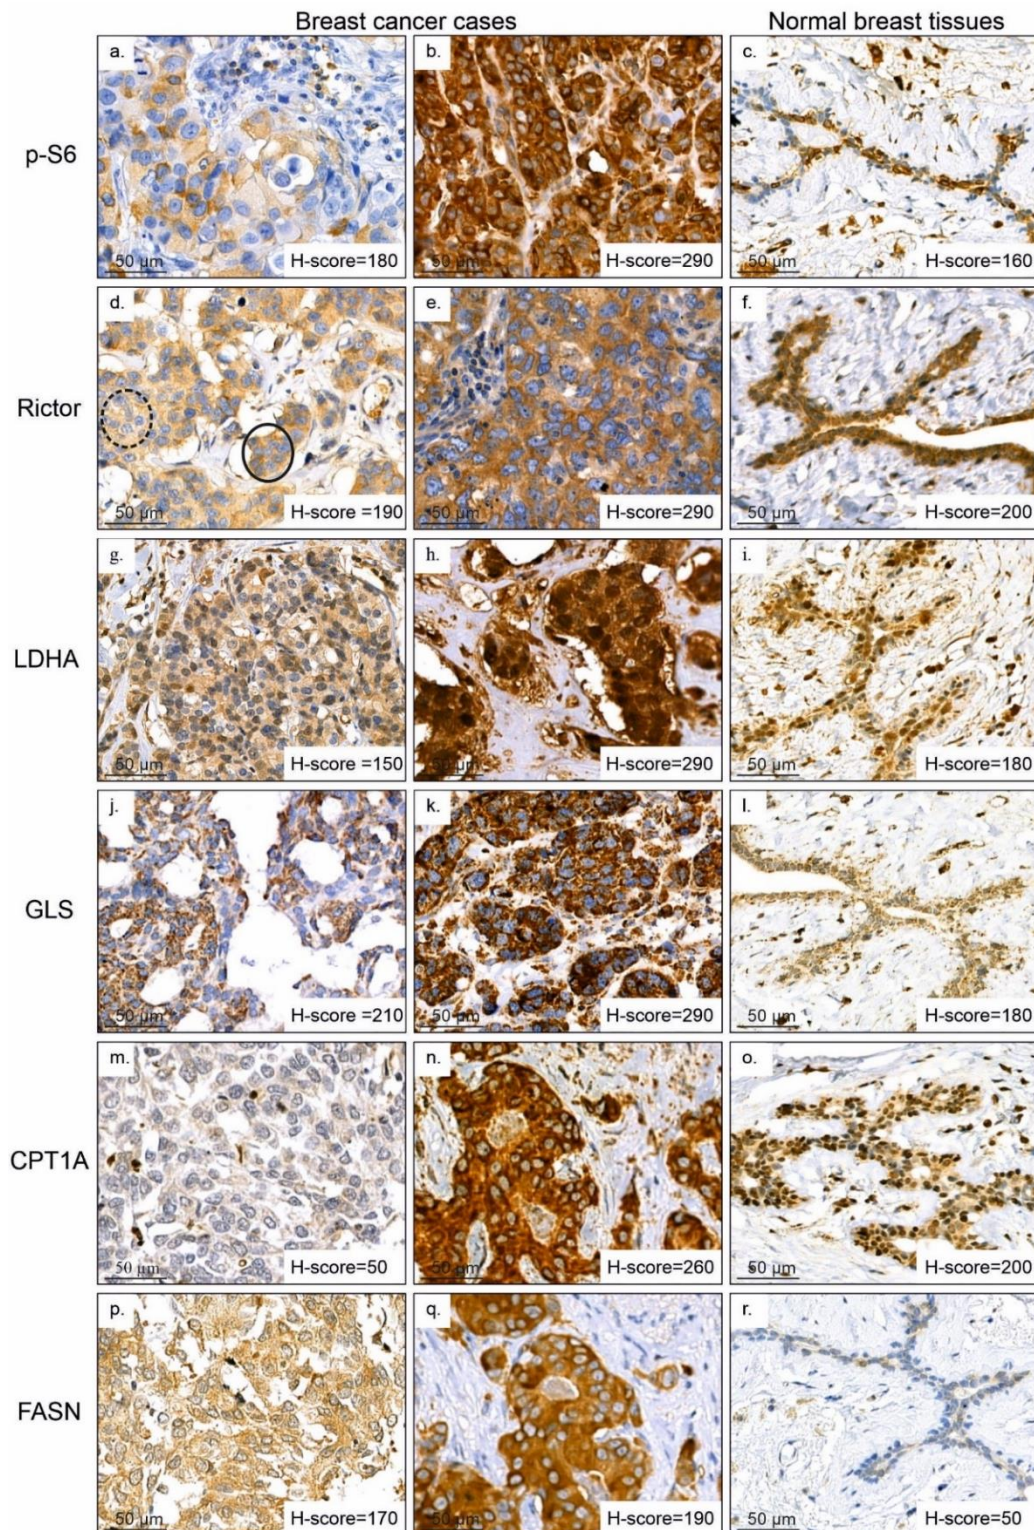

**Figure S3:** The expression of selected protein markers in human breast cancer tissues. IHC analysis of p-S6 (a.,b.,c.), Rictor (d., e.,f.), LDHA (g.,h.,i.), GLS (j.,k.,l.), FASN and CPT1A in formalin-fixed paraffin-embedded human tissues (breast cancer– a.,b.,d.,e.,g.,h.,j.,k.,m.,n.,p.,q. and normal tissues – c.,f.,e.,o.,r.); heterogenous stainings and homogenous stainings were also shown in the first and second column, respectively. The intra-tumoural heterogeneity of Rictor were labelled (dotted – low staining intensity; full circle – high staining intensity). Representative photos are shown. DAB (brown) was used as a chromogen. H-scores related to specific cases and scale bars are indicated.

**Table S1.** Average results from Alamar Blue and SRB tests in human breast cancer cell lines.

|             | MCF7      | T47D      | ZR75.1           | BT474     | SKBR3     | MDA-MB453        | MDA-MB231 | MDA-MB468 | BT549     | HS578T    |
|-------------|-----------|-----------|------------------|-----------|-----------|------------------|-----------|-----------|-----------|-----------|
| RAPA        | 73% ± 5%  | 57% ± 1%  | 70% ± 1%         | 70% ± 8%  | 56% ± 2%  | 48% ± 5%         | 78% ± 1%  | 80% ± 7%  | 80% ± 4%  | 55% ± 3%  |
| PP242       | 40% ± 6%  | 24% ± 2%  | 47% ± 1%         | 54% ± 4%  | 30% ± 2%  | 50% ± 3%         | 45% ± 2%  | 80% ± 3%  | 55% ± 6%  | 44% ± 1%  |
| GDC         | 70% ± 5%  | 24% ± 1%  | <b>70% ± 24%</b> | 40% ± 11% | 95% ± 3%  | <b>85% ± 17%</b> | 86% ± 1%  | 95% ± 1%  | 80% ± 3%  | 64% ± 1%  |
| 3BP         | 10% ± 7%  | 10% ± 9%  | 25% ± 3%         | 45% ± 3%  | 85% ± 9%  | 30% ± 10%        | 30% ± 1%  | 10% ± 1%  | 30% ± 7%  | 55% ± 11% |
| BPTES       | 90% ± 6%  | 80% ± 8%  | 100% ± 2%        | 75% ± 2%  | 95% ± 9%  | 75% ± 5%         | 75% ± 3%  | 95% ± 4%  | 75% ± 4%  | 45% ± 10% |
| BMS         | 95% ± 8%  | 80% ± 5%  | 95% ± 4%         | 95% ± 4%  | 100% ± 7% | 100% ± 4%        | 95% ± 4%  | n.a.      | n.a.      | 75% ± 6%  |
| Etomoxir    | 100% ± 9% | 50% ± 1%  | 95% ± 8%         | 100% ± 8% | 95% ± 4%  | 100% ± 4%        | 100% ± 4% | n.a.      | n.a.      | 90% ± 6%  |
| Doxorubicin | 67% ± 14% | 51% ± 13% | 67% ± 4%         | 61% ± 3%  | 67% ± 12% | 53% ± 21%        | 76% ± 6%  | 75% ± 1%  | 38% ± 33% | 64% ± 4%  |

**bold:** margin of error >15% (possibility of metabolic adaptation), **blue:**  $p < 0.05$ .

**Table S2.** KM-plotter meta-analysis of mRNA expression and clinicopathological data from breast cancer studies.

| Protein name | Gene Probe ID | KM-plotter Symbol | ER+PR+/- HER2-       |                         | ER+PR+/-HER2+/-      |               | HR- HER2+            |               | TNBC                 |               |
|--------------|---------------|-------------------|----------------------|-------------------------|----------------------|---------------|----------------------|---------------|----------------------|---------------|
|              |               |                   | n=1933*              |                         | n=1149*              |               | n=251*               |               | n=255*               |               |
|              |               |                   | *except Rictor n=841 |                         | *except Rictor n=407 |               | *except Rictor n=156 |               | *except Rictor n=161 |               |
|              |               |                   | Hazard Ratio         | log-rank test           | Hazard Ratio         | log-rank test | Hazard Ratio         | log-rank test | Hazard Ratio         | log-rank test |
| mTOR         | 202288_at     | MTOR              | 0.73                 | 0.0004**                | 0.73                 | 0.0014**      | 0.82                 | 0.31          | 1.13                 | 0.5745        |
| S6           | 201252_at     | S6                | 1.41                 | 7.8*10 <sup>-5</sup> ** | 1.39                 | 0.0007**      | 1.24                 | 0.2781        | 0.77                 | 0.2283        |
| Rictor       | 226312_at     | Rictor            | 0.86                 | 0.2314                  | 0.6                  | 0.0011**      | 0.98                 | 0.9457        | 0.56                 | 0.0401**      |
| LDHA         | 200650_s_at   | LDHA              | 1.28                 | 0.004**                 | 1.45                 | 0.0001**      | 1.23                 | 0.2857        | 1.4                  | 0.1202        |
| GLS          | 203159_at     | GLS               | 0.68                 | 0.000014**              | 0.74                 | 0.0017**      | 0.87                 | 0.4729        | 1.11                 | 0.633         |
| FASN         | 212218_s_at   | FASN              | 0.95                 | 0.5819                  | 0.86                 | 0.1107        | 1.01                 | 0.9429        | 0.85                 | 0.4485        |
| CPT1A        | 203634_s_at   | CPT1A             | 1.45                 | 1.9*10 <sup>-5</sup> ** | 1.06                 | 0.5398        | 0.72                 | 0.0904        | 1.18                 | 0.4363        |

Correlations with *better* or *worse* prognosis. \*  $p < 0.05$ , \*\*  $p < 0.01$ .

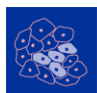

**Table S3.** List of breast cancer cell lines, including their IDs, most important mutations and subtypes.

| Cell line | ATCC number   | Mutation                | Subtype   |
|-----------|---------------|-------------------------|-----------|
| MCF7      | ATCC-HTB-22   | PIK3CA, CDKN2A          | Luminal A |
| T47D      | ATCC-HTB-133  | PIK3CA, TP53            |           |
| ZR75.1    | ATCC-CRL-1500 | PTEN                    | Luminal B |
| BT474     | ATCC-HTB-20   | PIK3CA, TP53            |           |
| SKBR3     | ATCC-HTB-30   | TP53, HER2 ampl.        | HER2+     |
| MDA-MB453 | ATCC-HTB-131  | PTEN, PIK3CA            |           |
| MDA-MB231 | ATCC-HTB-26   | TP53, CDKN2A, KRAS      | TNBC      |
| MDA-MB468 | ATCC-HTB-132  | PTEN, PIK3CA, TP53, RB1 |           |
| BT549     | ATCC-HTB-122  | PTEN, TP53, RB1         |           |
| HS578T    | ATCC-HTB-126  | TP53, CDKN2A, HRAS      |           |

**Table S4.** List of the applied mTOR and metabolic inhibitors.

| Name of inhibitor                                              | Abbreviation | Manufacturer      | Applied final concentration | Target of inhibition |
|----------------------------------------------------------------|--------------|-------------------|-----------------------------|----------------------|
| rapamycin                                                      | RAPA         | Sigma-Aldrich     | 50 ng/ml                    | mTORC1               |
| PP242                                                          | PP242        | Tocris Bioscience | 1 µM                        | mTORC1/C2            |
| BMS-303141                                                     | BMS          | Sigma-Aldrich     | 10 µM                       | lipid synthesis      |
| etomoxir                                                       | ETO          | Sigma-Aldrich     | 50 µM                       | lipid oxidation      |
| 3-bromopyruvate                                                | 3BP          | Sigma-Aldrich     | 100 µM                      | glycolysis           |
| bis-2-(5-phenylacetamido-1,3,4-thiadiazol-2-yl)-ethyl sulphide | BPTES        | Sigma-Aldrich     | 10 µM                       | glutaminolysis       |
| GDC0068                                                        | GDC          | Cayman Chemical   | 1 µM                        | Akt                  |
| Doxorubicin                                                    | doxo         | Sigma-Aldrich     | 50 ng/ml                    | topoisomerase II     |

**Table S5.** List of primary antibodies used for Western blot and Immunohistochemistry.

| Primary antibody                          | Manufacturer and catalogue number | Dilutions |      |        | Target/Function/Marker |
|-------------------------------------------|-----------------------------------|-----------|------|--------|------------------------|
|                                           |                                   | WB        | WES  | IHC    |                        |
| phospho-mTOR (p-mTOR)                     | Cell Signaling (#2976)            | 1:1000    | -    | -      | mTOR complex activity  |
| Raptor                                    | Abcam (#40768)                    | 1:1000    | -    | -      | mTOR complex activity  |
| phospho-ribosomal S6 (p-S6)               | Cell Signalling (#4858)           | 1:1000    | 1:50 | 1:100  | mTOR complex activity  |
| Rictor                                    | Cell Signaling (#2140)            | 1:1000    | 1:50 | -      | mTOR complex activity  |
| Rictor                                    | Bethyl (A300-458A)                | -         | -    | 1:1000 | mTOR complex activity  |
| phospho-Akt (Ser473) (p-Akt)              | Cell Signaling (#4060)            | 1:2000    | -    | -      | mTOR complex activity  |
| Glucose transporter 1 (GLUT1)             | Abcam (#652)                      | 1:1000    | -    | -      | glucose transporter    |
| Glucose-6-phosphate dehydrogenase (G6PDH) | Abcam (#133525)                   | 1:1000    | -    | -      | glycolysis             |
| Glyceraldehyde 3-phosphate dehydrogenase  | Abcam (#8245)                     | 1:10000   | -    | -      | glycolysis             |

| (GAPDH)                                                 |                        |        |      |       |  |                                         |
|---------------------------------------------------------|------------------------|--------|------|-------|--|-----------------------------------------|
| Hexokinase II (HK2)                                     | Cell Signaling (#2867) | -      | 1:50 | 1:200 |  | glycolysis                              |
| Lactate Dehydrogenase A (LDHA)                          | Cell Signaling (#3582) | 1:1000 | 1:50 | 1:400 |  | glycolysis                              |
| Lactate Dehydrogenase B (LDHB)                          | Abcam (#85319)         | 1:2000 | -    | -     |  | reverse Waburg effect                   |
| Glutaminase (GLS)                                       | Abcam (#156876)        | 1:1000 | 1:50 | 1:200 |  | glutaminolysis                          |
| Fatty acid synthase (FASN)                              | Cell Signaling (#3180) | 1:1000 | 1:50 | 1:100 |  | fatty acid synthesis                    |
| phospho-ATP-Citrate Lyase (p-Acly)                      | Cell Signaling (#4331) | 1:1000 | -    | -     |  | fatty acid synthesis                    |
| Carnitine Palmitoyltransferase 1A (CPT1A)               | Abcam (#128568)        | 1:1000 | 1:50 | 1:500 |  | fatty acid oxidation                    |
| Acyl-CoA synthetase short-chain family member 2 (ACSS2) | Cell Signaling (#3658) | 1:1000 | 1:50 | 1:200 |  | acetate consumption                     |
| $\beta$ -F1-ATPase (ATPB)                               | Abcam (#14730)         | 1:2000 | -    | -     |  | mitochondrial oxidative phosphorylation |
